# Supplementary material for: The indium(iii) chloride catalyzed synthesis of sulfur incorporated 3-acylcoumarins; their photochromic and acetate sensing properties
Source: Royal Society of Chemistry journal article supplement (doi:10.1039/c4ra09228g), 2014-01-01
Supplement: c4ra09228g1.pdf [file c4ra09228g1.pdf]

### The indium(III) chloride catalyzed synthesis and photochromic properties of some 3-acylcoumarins with sulfur in the C3-sidechain

H. Surya Prakash Rao\*, Avinash Desai

Department of Chemistry, Pondicherry University, Pondicherry – 605 014 India.

E.mail: hspr.che@pondiuni.edu.in; Telephone: +91413 2654411; Fax: +91413 2656230

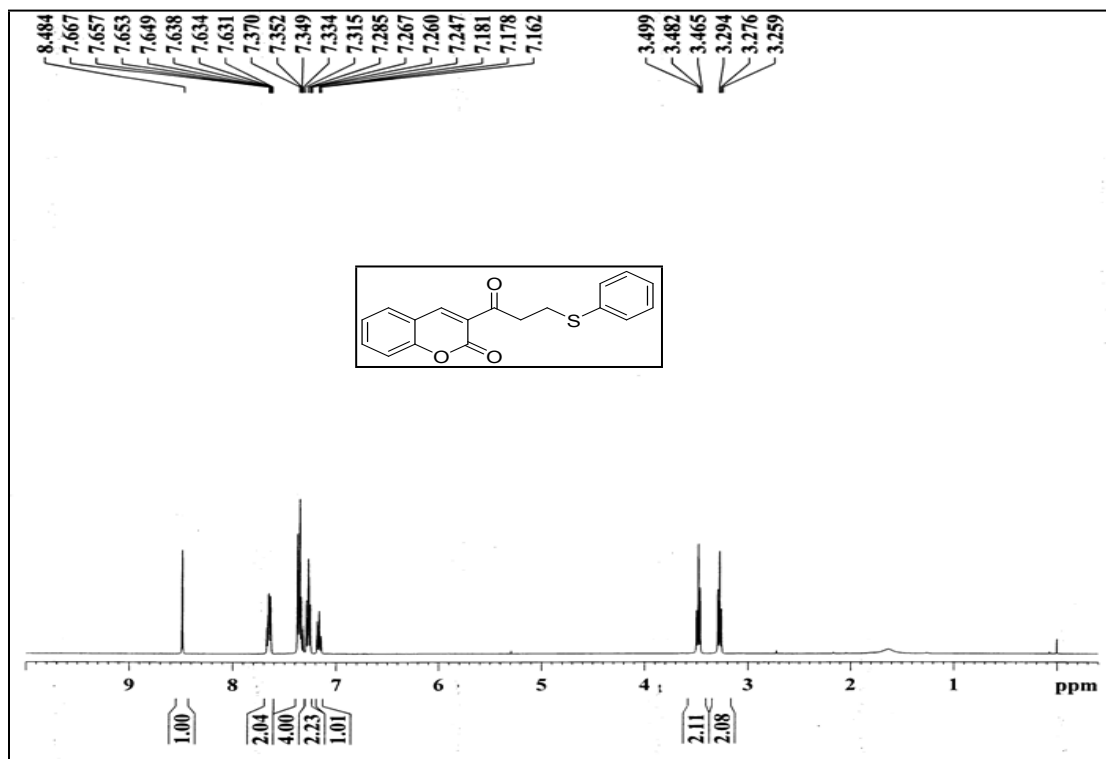

**Figure 7.** <sup>1</sup>H NMR (400 MHz, CCl<sub>4</sub> + CDCl<sub>3</sub>, 1:1) spectrum of 3-(3-(phenylthio)propanoyl)-2H-chromen-2-one **3c**.

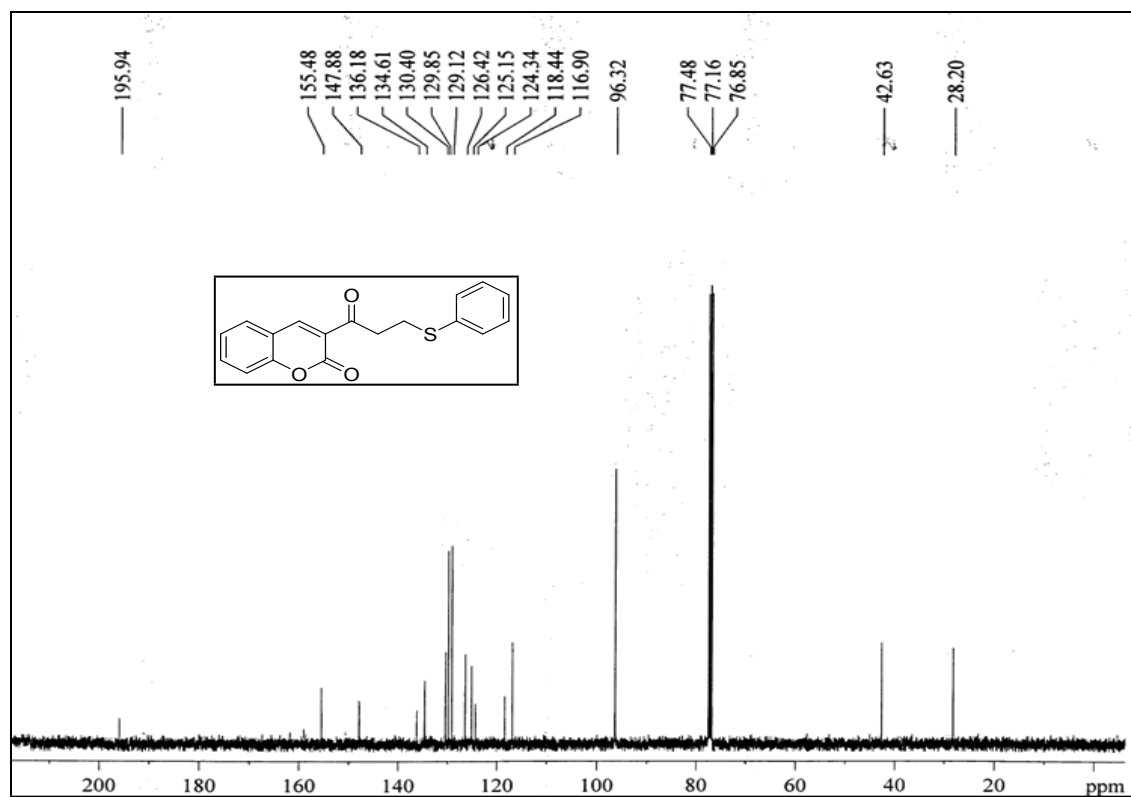

**Figure 8.** <sup>13</sup>C NMR (100 MHz, CCl<sub>4</sub> + CDCl<sub>3</sub>, 1:1) spectrum 3-(3-(phenylthio)propanoyl)-2H-chromen-2-one **3c**.

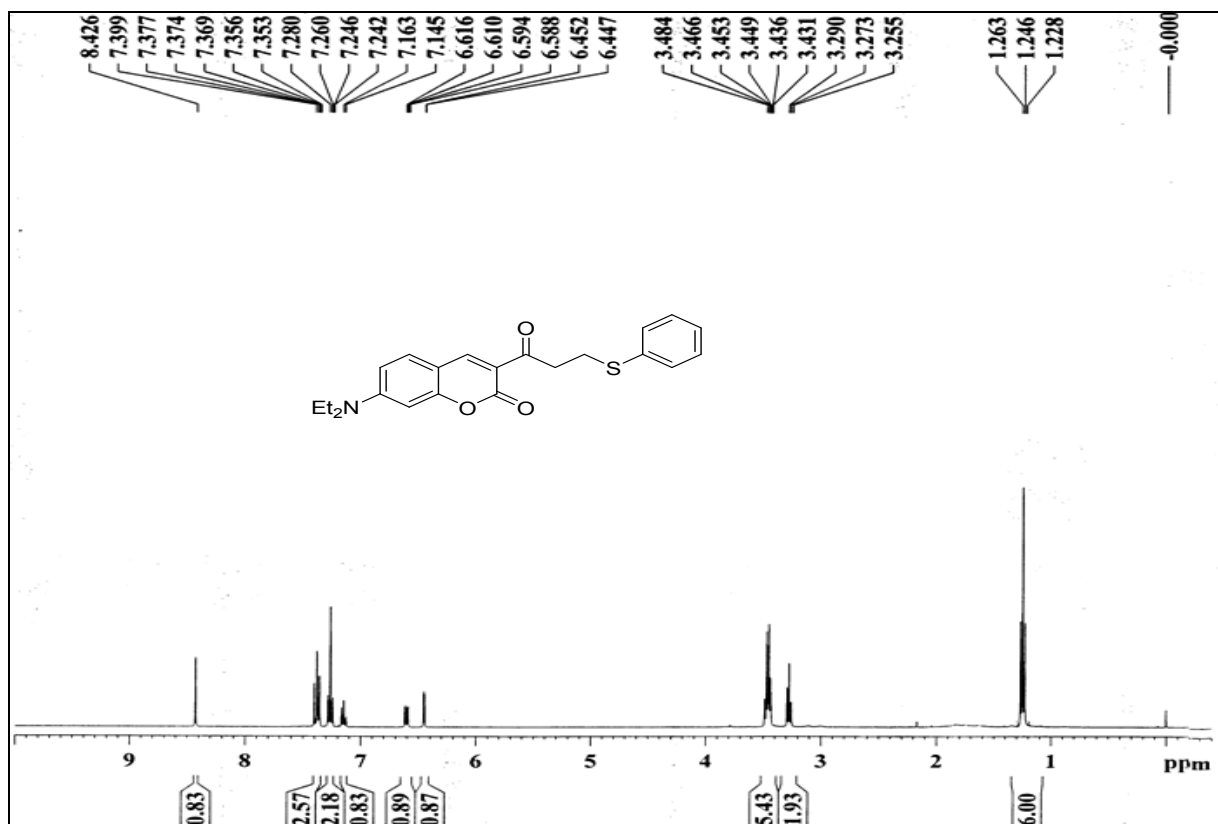

**Figure 9.** <sup>1</sup>H NMR (400 MHz, CCl<sub>4</sub> + CDCl<sub>3</sub>, 1:1) spectrum of 7-(diethylamino)-3-(3-(phenylthio)propanoyl)-2H-chromen-2-one **3f**.

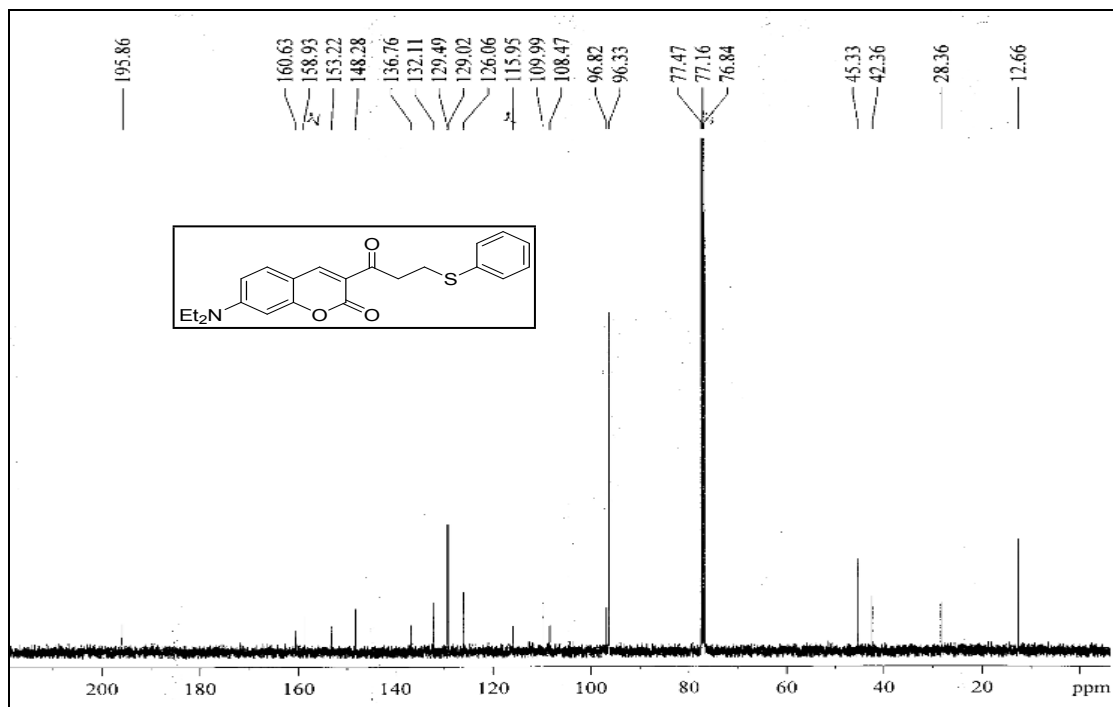

**Figure 10.**  $^{13}\text{C}$  NMR (100 MHz,  $\text{CCl}_4 + \text{CDCl}_3$ , 1:1) spectrum of 7-(diethylamino)-3-(3-(phenylthio)propanoyl)-2*H*-chromen-2-one **3f**.

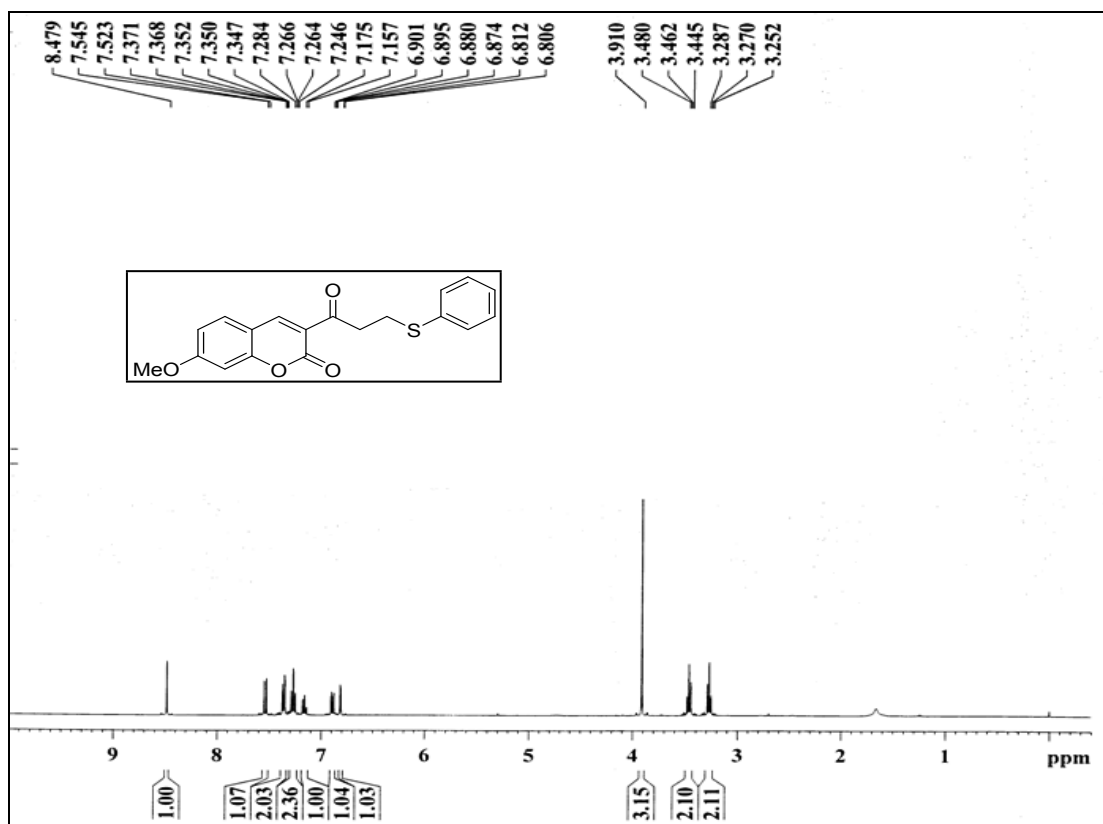

**Figure 11.** <sup>1</sup>H NMR (400 MHz, CCl<sub>4</sub> + CDCl<sub>3</sub>, 1:1) spectrum 7-methoxy-3-(3-(phenylthio)propanoyl)-2H-chromen-2-one **3h**.

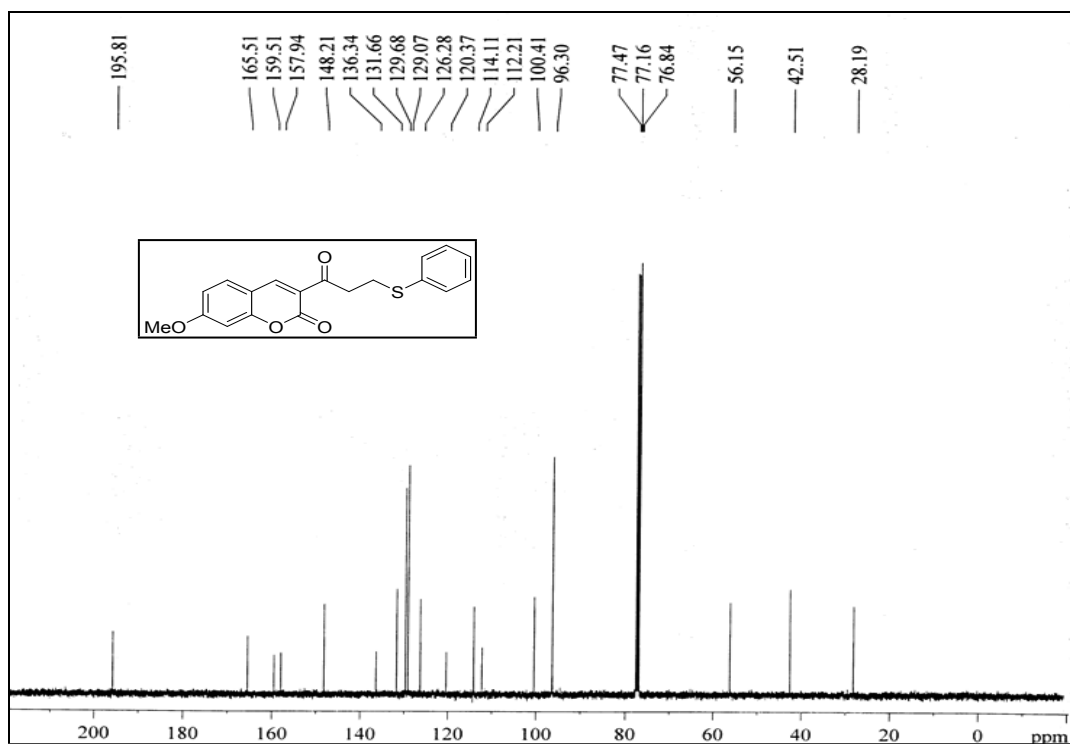

**Figure 12.** <sup>13</sup>C NMR (100 MHz, CCl<sub>4</sub> + CDCl<sub>3</sub>, 1:1) spectrum of 7-methoxy-3-(3-(phenylthio)propanoyl)-2H-chromen-2-one **3h**.

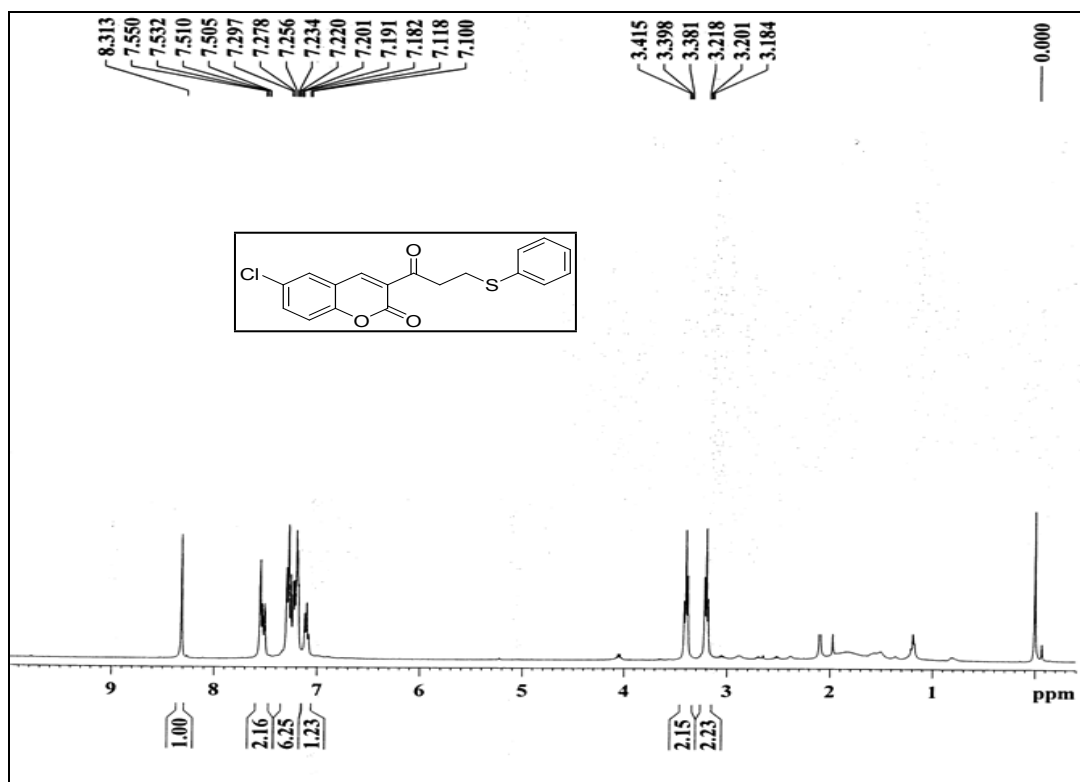

**Figure 13.** <sup>1</sup>H NMR (400 MHz, CCl<sub>4</sub> + CDCl<sub>3</sub>, 1:1) spectrum of 6-chloro-3-(3-(phenylthio)propanoyl)-2H-chromen-2-one **31**.

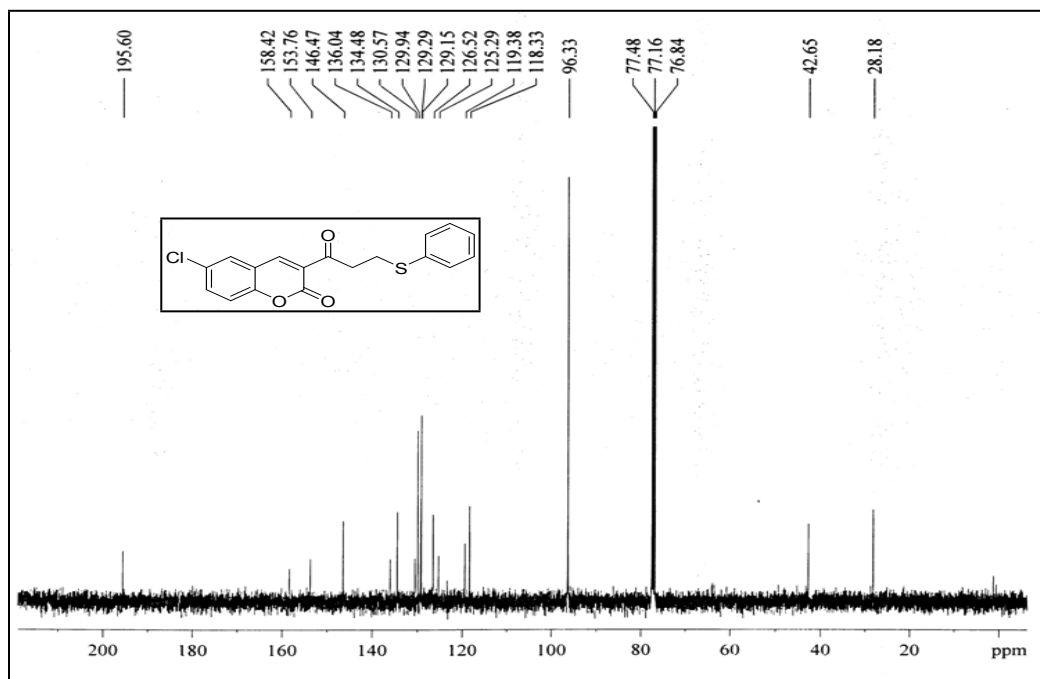

**Figure 14.** <sup>13</sup>C NMR (100 MHz, CCl<sub>4</sub> + CDCl<sub>3</sub>, 1:1) spectrum of 6-chloro-3-(3-(phenylthio)propanoyl)-2H-chromen-2-one **31**.



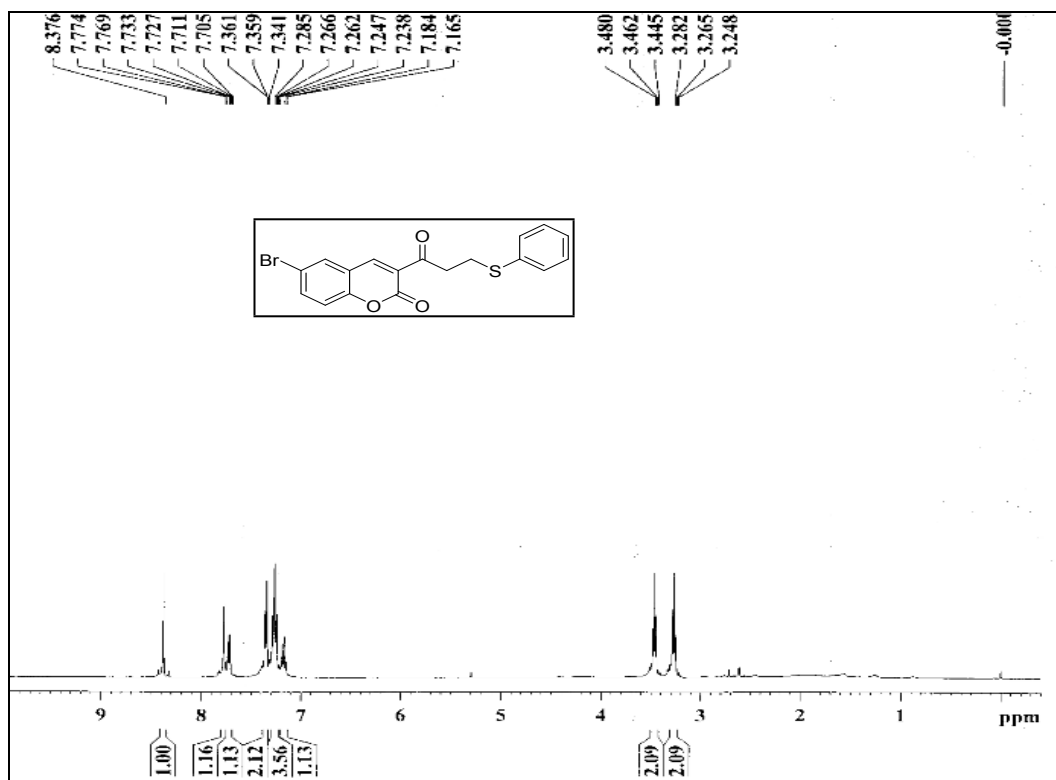

**Figure 15.** <sup>1</sup>H NMR (400 MHz, CCl<sub>4</sub> + CDCl<sub>3</sub>, 1:1) spectrum of 6-bromo-3-(3-(phenylthio)propanoyl)-2H-chromen-2-one **30**.

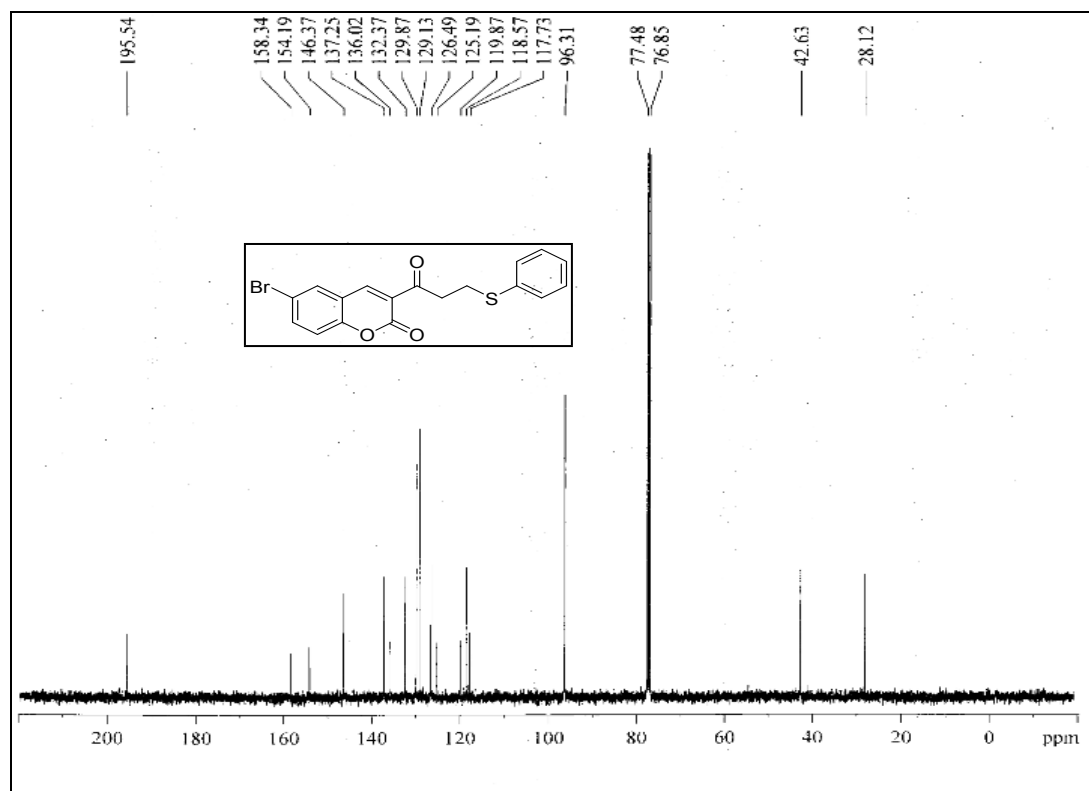

**Figure 16.**  $^{13}\text{C}$  NMR (100 MHz,  $\text{CCl}_4 + \text{CDCl}_3$ , 1:1) spectrum of 6-bromo-3-(3-(phenylthio)propanoyl)-2H-chromen-2-one **30**.

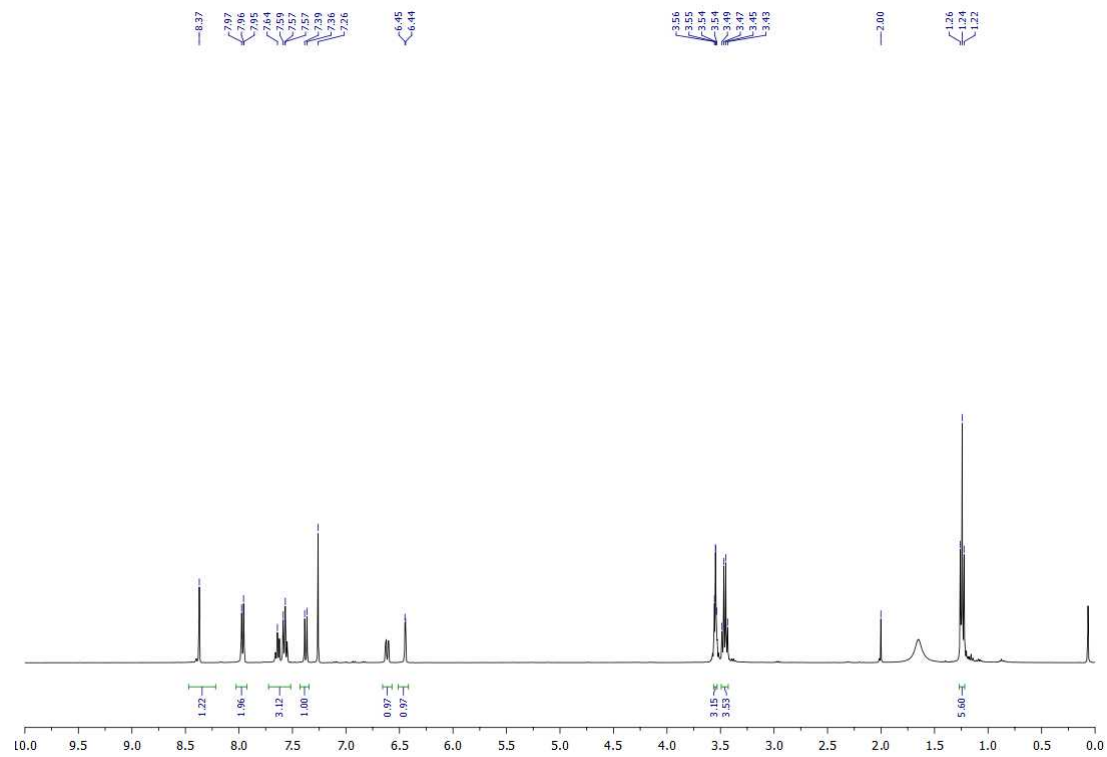

**Figure 17.** <sup>1</sup>H NMR (400 MHz, CCl<sub>4</sub> + CDCl<sub>3</sub>, 1:1) spectrum of 7-(diethylamino)-3-(3-(phenylsulfinyl)propanoyl)-2*H*-chromen-2-one **3p**.

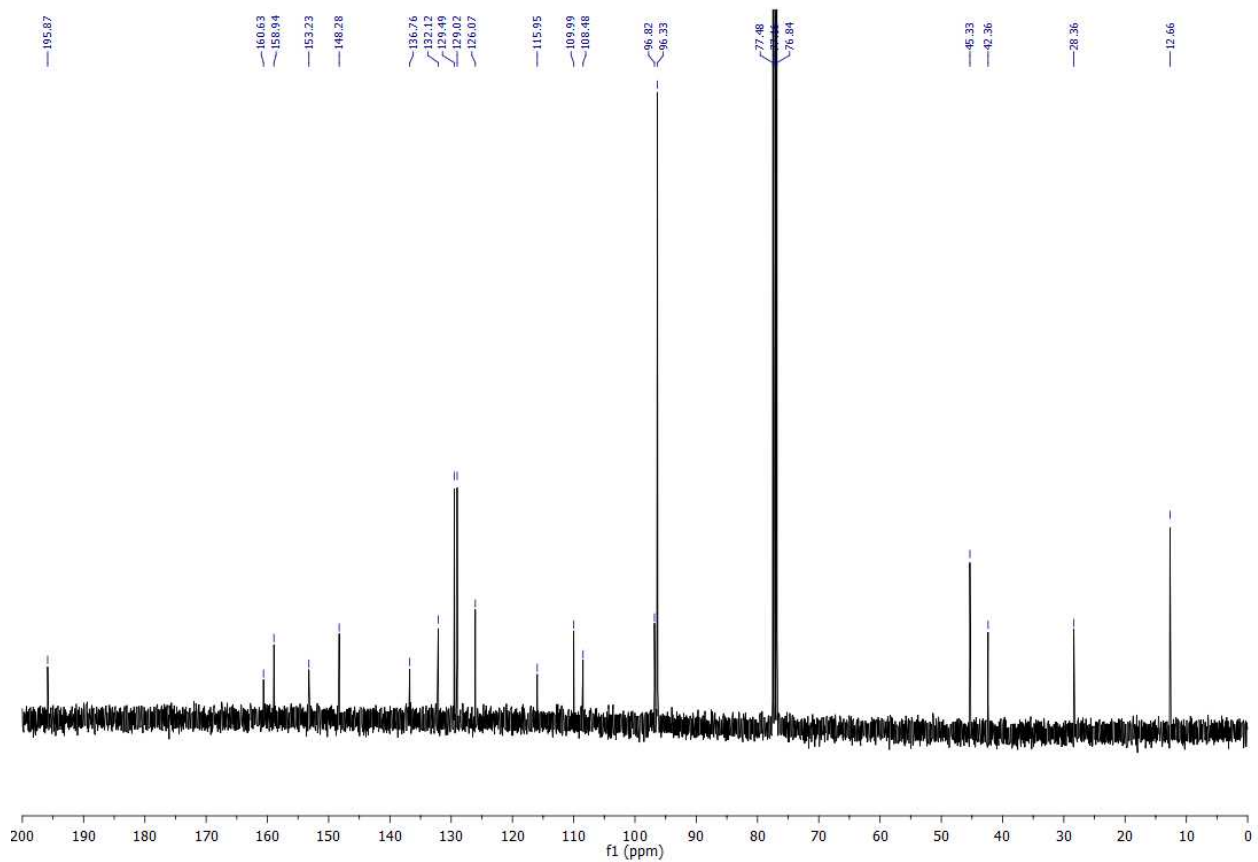

**Figure 18.**  $^{13}\text{C}$  NMR (100 MHz,  $\text{CCl}_4 + \text{CDCl}_3$ , 1:1) spectrum of 7-(diethylamino)-3-(3-(phenylsulfinyl)propanoyl)-2H-chromen-2-one **3p**.

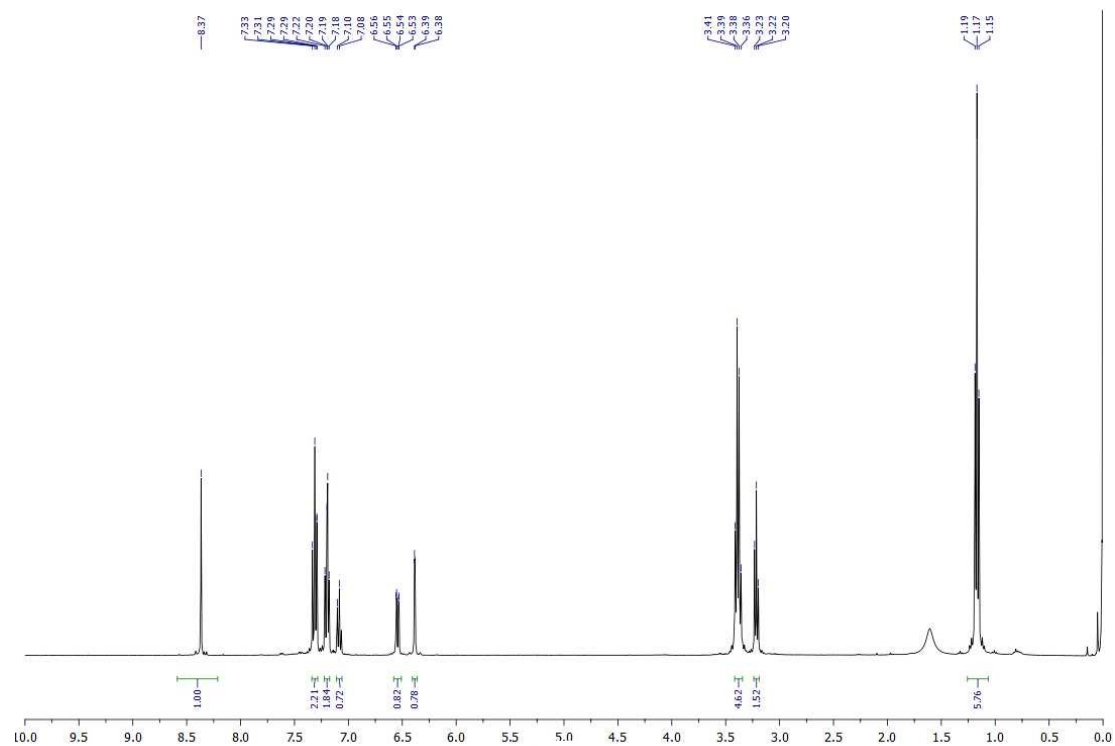

**Figure 19.** <sup>1</sup>H NMR (400 MHz, CCl<sub>4</sub> + CDCl<sub>3</sub>, 1:1) spectrum of 7-(diethylamino)-3-(3-(phenylsulfonyl)propanoyl)-2H-chromen-2-one **3q**.

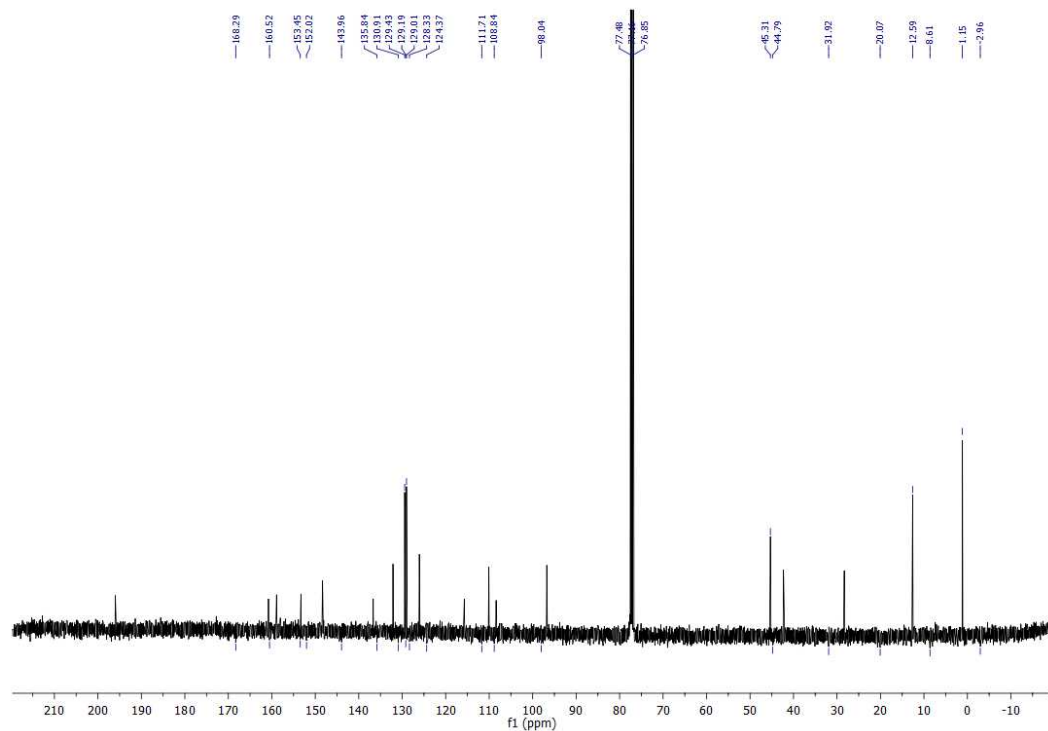

**Figure 20.**  $^{13}\text{C}$  NMR (100 MHz,  $\text{CCl}_4 + \text{CDCl}_3$ , 1:1) spectrum of 7-(diethylamino)-3-(3-(phenylsulfonyl)propanoyl)-2*H*-chromen-2-one **3q**.

## UV visible spectra of coumarins of **3p** and **3f** in different solvents

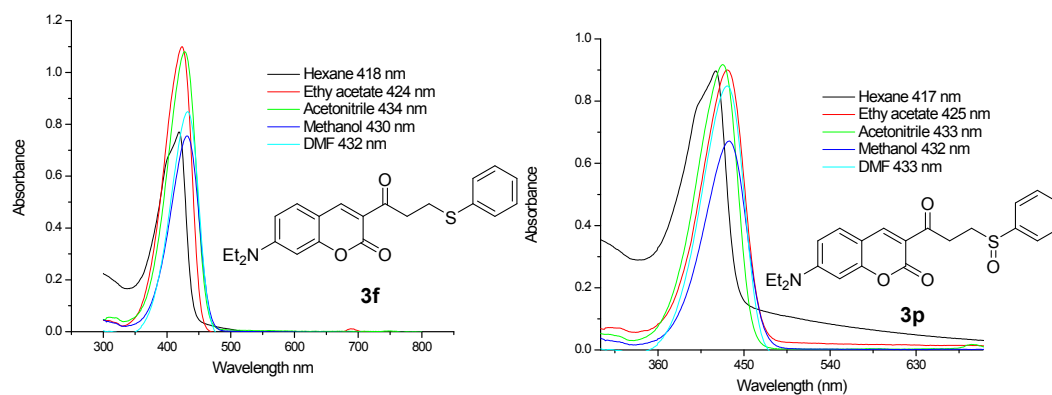

**Figure 26.** Absorption spectra of sulfone **3f** (8.8  $\mu\text{M}$ ) and parent **3p** (9.8  $\mu\text{M}$ ) in hexane (black), EtOAc (red), MeCN (green), MeOH (blue), DMF (cyan)
